# Supplementary material for: In Vitro and In Silico Kinetic Studies of Patented 1,7-diEthyl and 1,7-diMethyl Aminoalkanol Derivatives as New Inhibitors of Acetylcholinesterase
Source: MDPI journal article supplement (doi:10.3390/ijms23010270), 2021-12-27
Supplement: s1 [file s1]

**Table S1.** Competitive inhibition. Values characterizing the course of the reaction in the presence of the inhibitor (I), (II), (III) and (IV) of acetylcholinesterase. The data present the changes of peak area corresponding to the increase in the amount of reaction product (4,4-dithio-bis-acid nitrobenzoic) and reaction speed ( $V_0$  and  $1/V_0$ ) in the system without inhibitors ( $C_{0.00}$ ) and with inhibitors (I), (II), (III) and (IV) at concentrations of 0.08 mM ( $C_{0.08}$ ) and the other concentration from 0.00 mM to 0.08 mM. The changes in enzymatic reaction parameters were registered in the presence of the substrate (acetylthiocholine) at specific concentrations in the range of 0.36–46.00 mM.

| Substrate concentration (acetylthiocholine) [S] (mM) | $\frac{1}{[S]}$ | Peak area [PA]                                                    |        |        |                              |        |      |                              |        |     |
|------------------------------------------------------|-----------------|-------------------------------------------------------------------|--------|--------|------------------------------|--------|------|------------------------------|--------|-----|
|                                                      |                 | Speed reaction = amount of the produced product/min               |        |        |                              |        |      |                              |        |     |
|                                                      |                 | Amount of the product (4,4-dithio-bis-acid nitrobenzoic) (mM/min) |        |        |                              |        |      |                              |        |     |
|                                                      |                 | <b>C<sub>0.00</sub></b>                                           |        |        | <b>C<sub>0.08</sub> (I)</b>  |        |      | <b>C<sub>0.08</sub> (II)</b> |        |     |
|                                                      | Mean            | SD                                                                | %RSD   | Mean   | SD                           | %RSD   | Mean | SD                           | %RSD   |     |
| 0.36                                                 | 2.78            | 63196                                                             | 1453.5 | 2.3    | 49766                        | 1343.7 | 2.7  | 56086                        | 1738.7 | 3.1 |
| 0.72                                                 | 1.39            | 115890                                                            | 2433.7 | 2.1    | 91263                        | 2372.8 | 2.6  | 102853                       | 2879.9 | 2.8 |
| 1.44                                                 | 0.69            | 163569                                                            | 3925.7 | 2.4    | 128810                       | 3220.3 | 2.5  | 145167                       | 3919.5 | 2.7 |
| 2.88                                                 | 0.35            | 217345                                                            | 4129.6 | 1.9    | 171159                       | 3765.5 | 2.2  | 192894                       | 4822.4 | 2.5 |
| 5.75                                                 | 0.17            | 263046                                                            | 5260.9 | 2.0    | 207149                       | 4350.1 | 2.1  | 233453                       | 5369.4 | 2.3 |
| 11.50                                                | 0.09            | 293673                                                            | 5579.8 | 1.9    | 231267                       | 4625.3 | 2.0  | 260635                       | 5733.9 | 2.2 |
| 23.00                                                | 0.04            | 314657                                                            | 5349.2 | 1.7    | 247792                       | 4708.0 | 1.9  | 279258                       | 5585.2 | 2.0 |
| 34.50                                                | 0.03            | 318064                                                            | 5089.0 | 1.6    | 250475                       | 4508.6 | 1.8  | 282281                       | 5363.3 | 1.9 |
| 46.00                                                | 0.02            | 319546                                                            | 5112.7 | 1.6    | 251643                       | 4529.6 | 1.8  | 283597                       | 4821.1 | 1.7 |
|                                                      |                 | <b>C<sub>0.08</sub> (III)</b>                                     |        |        | <b>C<sub>0.08</sub> (IV)</b> |        |      |                              |        |     |
|                                                      | Mean            | SD                                                                | %RSD   | Mean   | SD                           | %RSD   |      |                              |        |     |
|                                                      | 39497           | 789.9                                                             | 2.0    | 45817  | 1145.4                       | 2.5    |      |                              |        |     |
|                                                      | 72431           | 1376.2                                                            | 1.9    | 84020  | 2016.5                       | 2.4    |      |                              |        |     |
|                                                      | 102230          | 1942.4                                                            | 1.9    | 118587 | 2846.1                       | 2.4    |      |                              |        |     |
|                                                      | 135840          | 2445.1                                                            | 1.8    | 157575 | 3466.7                       | 2.2    |      |                              |        |     |
|                                                      | 164404          | 2794.9                                                            | 1.7    | 190708 | 4004.9                       | 2.1    |      |                              |        |     |
|                                                      | 183545          | 2936.7                                                            | 1.6    | 212913 | 4258.3                       | 2.0    |      |                              |        |     |
|                                                      | 196660          | 3146.6                                                            | 1.6    | 228126 | 4106.3                       | 1.8    |      |                              |        |     |
|                                                      | 198790          | 3180.6                                                            | 1.6    | 230596 | 4150.7                       | 1.8    |      |                              |        |     |
|                                                      | 199716          | 2995.7                                                            | 1.5    | 231671 | 4170.1                       | 1.8    |      |                              |        |     |
|                                                      |                 | <b>V<sub>0</sub> (mM/min)</b>                                     |        |        |                              |        |      |                              |        |     |
|                                                      |                 | <b>C<sub>0.00</sub></b>                                           |        |        | <b>C<sub>0.08</sub> (I)</b>  |        |      | <b>C<sub>0.08</sub> (II)</b> |        |     |
|                                                      | Mean            | SD                                                                | %RSD   | Mean   | SD                           | %RSD   | Mean | SD                           | %RSD   |     |
|                                                      | 0.17            | 0.002                                                             | 1.22   | 0.11   | 0.001                        | 1.35   | 0.11 | 0.001                        | 1.45   |     |
|                                                      | 0.27            | 0.004                                                             | 1.54   | 0.18   | 0.003                        | 1.62   | 0.19 | 0.002                        | 1.82   |     |
|                                                      | 0.38            | 0.007                                                             | 1.77   | 0.28   | 0.005                        | 1.85   | 0.29 | 0.004                        | 1.93   |     |
|                                                      | 0.50            | 0.012                                                             | 2.47   | 0.43   | 0.008                        | 1.98   | 0.43 | 0.008                        | 2.15   |     |
|                                                      | 0.53            | 0.015                                                             | 2.76   | 0.49   | 0.013                        | 2.75   | 0.49 | 0.011                        | 2.86   |     |
|                                                      | 0.59            | 0.020                                                             | 3.37   | 0.56   | 0.019                        | 3.42   | 0.56 | 0.016                        | 3.11   |     |
|                                                      | 0.61            | 0.021                                                             | 3.44   | 0.59   | 0.021                        | 3.59   | 0.59 | 0.020                        | 3.58   |     |
|                                                      | 0.63            | 0.018                                                             | 3.87   | 0.65   | 0.024                        | 3.74   | 0.65 | 0.022                        | 3.90   |     |
|                                                      | 0.67            | 0.026                                                             | 3.92   | 0.67   | 0.027                        | 4.12   | 0.67 | 0.024                        | 4.41   |     |
|                                                      |                 | <b>C<sub>0.08</sub> (III)</b>                                     |        |        | <b>C<sub>0.08</sub> (IV)</b> |        |      |                              |        |     |
|                                                      | Mean            | SD                                                                | %RSD   | Mean   | SD                           | %RSD   |      |                              |        |     |
|                                                      | 0.10            | 0.001                                                             | 1.12   | 0.10   | 0.002                        | 2.15   |      |                              |        |     |
|                                                      | 0.18            | 0.002                                                             | 1.18   | 0.19   | 0.004                        | 2.33   |      |                              |        |     |
|                                                      | 0.28            | 0.005                                                             | 1.65   | 0.29   | 0.008                        | 2.85   |      |                              |        |     |
|                                                      | 0.42            | 0.010                                                             | 2.40   | 0.43   | 0.013                        | 3.04   |      |                              |        |     |
|                                                      | 0.49            | 0.013                                                             | 2.72   | 0.49   | 0.017                        | 3.42   |      |                              |        |     |

|      |       |      |      |       |      |
|------|-------|------|------|-------|------|
| 0.56 | 0.019 | 3.45 | 0.56 | 0.022 | 3.89 |
| 0.59 | 0.022 | 3.78 | 0.59 | 0.024 | 4.05 |
| 0.65 | 0.025 | 3.85 | 0.65 | 0.028 | 4.28 |
| 0.64 | 0.024 | 3.80 | 0.65 | 0.030 | 4.67 |

$$\frac{1}{V_o}$$

(min/mM)

| C <sub>0.00</sub>       |       |      | C <sub>0.08</sub> (I)  |       |      | C <sub>0.08</sub> (II) |       |      |
|-------------------------|-------|------|------------------------|-------|------|------------------------|-------|------|
| Mean                    | SD    | %RSD | Mean                   | SD    | %RSD | Mean                   | SD    | %RSD |
| 5.85                    | 0.070 | 1.20 | 9.30                   | 0.104 | 1.12 | 9.19                   | 0.104 | 1.13 |
| 3.70                    | 0.056 | 1.52 | 5.46                   | 0.064 | 1.18 | 5.40                   | 0.064 | 1.19 |
| 2.60                    | 0.046 | 1.78 | 3.55                   | 0.058 | 1.65 | 3.50                   | 0.057 | 1.64 |
| 2.00                    | 0.049 | 2.46 | 2.30                   | 0.055 | 2.40 | 2.30                   | 0.054 | 2.38 |
| 1.90                    | 0.052 | 2.77 | 2.05                   | 0.056 | 2.72 | 2.05                   | 0.055 | 2.73 |
| 1.70                    | 0.057 | 3.38 | 1.80                   | 0.062 | 3.45 | 1.80                   | 0.062 | 3.46 |
| 1.65                    | 0.056 | 3.42 | 1.70                   | 0.064 | 3.78 | 1.70                   | 0.064 | 3.77 |
| 1.60                    | 0.062 | 3.89 | 1.55                   | 0.059 | 3.85 | 1.55                   | 0.059 | 3.82 |
| 1.50                    | 0.058 | 3.92 | 1.50                   | 0.049 | 3.27 | 1.50                   | 0.059 | 3.91 |
| C <sub>0.08</sub> (III) |       |      | C <sub>0.08</sub> (IV) |       |      |                        |       |      |
| Mean                    | SD    | %RSD | Mean                   | SD    | %RSD |                        |       |      |
| 10.1                    | 0.093 | 0.93 | 9.85                   | 0.110 | 1.12 |                        |       |      |
| 5.70                    | 0.071 | 1.26 | 5.40                   | 0.064 | 1.18 |                        |       |      |
| 3.55                    | 0.066 | 1.86 | 3.50                   | 0.058 | 1.65 |                        |       |      |
| 2.40                    | 0.066 | 2.75 | 2.30                   | 0.055 | 2.40 |                        |       |      |
| 2.05                    | 0.060 | 2.94 | 2.05                   | 0.056 | 2.72 |                        |       |      |
| 1.80                    | 0.064 | 3.58 | 1.80                   | 0.062 | 3.45 |                        |       |      |
| 1.70                    | 0.063 | 3.75 | 1.70                   | 0.064 | 3.78 |                        |       |      |
| 1.55                    | 0.044 | 2.87 | 1.55                   | 0.059 | 3.85 |                        |       |      |
| 1.50                    | 0.050 | 3.36 | 1.50                   | 0.054 | 3.62 |                        |       |      |
